# Supplementary material for: Role of certain amino acid residues of the coelenterazine-binding cavity in bioluminescence of light-sensitive Ca2+-regulated photoprotein berovin
Source: Royal Society of Chemistry journal article supplement (doi:10.1039/c6pp00050a), 2016-04-11
Supplement: c6pp00050a1.pdf [file c6pp00050a1.pdf]

Electronic Supplementary Information for

**Role of certain amino acid residues of coelenterazine-binding cavity in bioluminescence of light-sensitive Ca<sup>2+</sup>-regulated photoprotein berovin**

Ludmila P. Burakova<sup>a,§</sup>, Galina A. Stepanyuk<sup>a,§</sup>, Elena V. Ereemeeva<sup>a</sup> and Eugene S. Vysotski<sup>a,\*</sup>

*<sup>a</sup>Photobiology Laboratory, Institute of Biophysics, Russian Academy of Sciences, Siberian Branch, Krasnoyarsk, 660036, Russia*

<sup>§</sup>These authors contributed equally to this work.

\*Corresponding author:

Fax: +7 (391) 243-3400; Tel: +7 (391) 249-4430;

E-mail: eugene.vysotski@gmail.com or eugene\_vysotski@ibp.ru

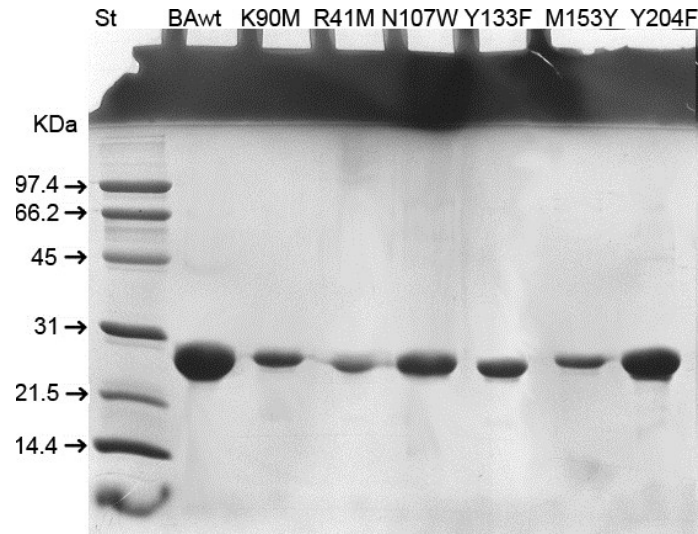

**Fig. S1** SDS-PAGE purity analysis of the wild type berovin and its certain mutants after purification on Mono Q column. Lanes: 1, standard proteins; 2, wild type berovin; 3-8, berovin mutants. 12.5% polyacrylamide gel was stained with Coomassie Brilliant Blue.

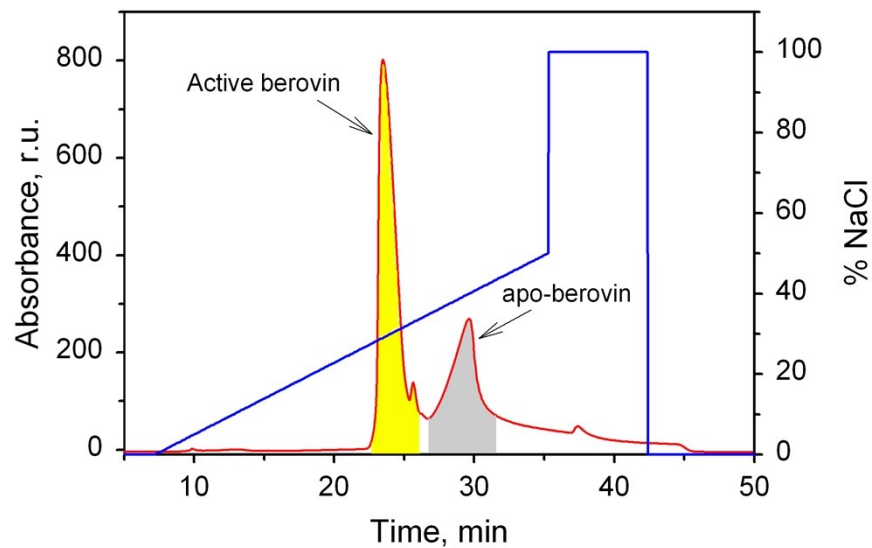

**Fig. S2** Example of chromatographic separation of an active photoprotein from apoprotein on Mono Q column. The berovin was eluted with a linear salt gradient of NaCl from 0 to 0.5 M (blue line). The fractions corresponding to the active berovin and apo-berovin are highlighted by yellow and grey, respectively.

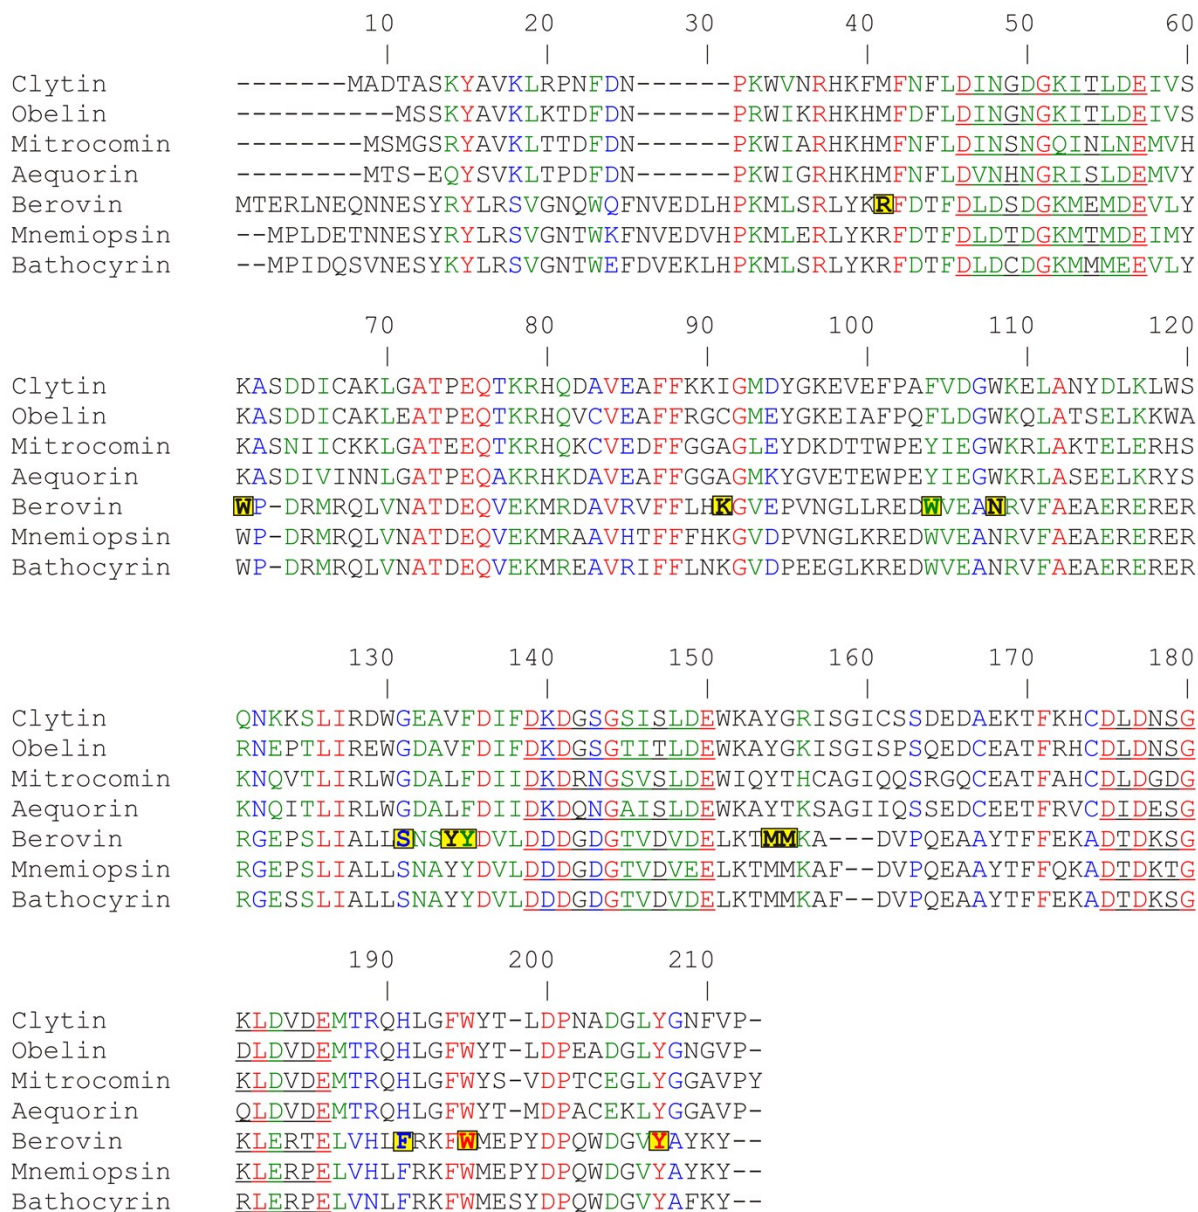

**Fig. S3** Comparison of the amino acid sequence of berovin (AFE88612) with those of hydroid photoproteins: obelin from *Obelia longissima* (Q27709), aequorin from *Aequorea victoria* (P07164), clytin from *Clytia gregaria* (CAA49754), mitrocomin from *Mitrocoma cellularia* (AIU48027), and ctenophore photoproteins: mnemiopsin from *Mnemiopsis leidyi* (ADD70248) and bathocyryn from *Bathocyroe fosteri*<sup>29</sup>. Red and blue letters represent identical and similar residues, respectively, black letters show nonsimilar residues. The residues that form the Ca<sup>2+</sup>-binding site are underlined. Gaps are shown by dashes. The amino acid residues forming the inner coelenterazine-binding cavity of the berovin are highlighted by yellow boxes.

**Table S1** The results of 2-hydroperoxycoelenterazine docking

| Model  | Estimated free energy of bonding (kcal/mol) | Estimated inhibition constant | vdW + H-bond + dissolve energy (kcal/mol) | Electrostatic energy (kcal/mol) | Total intermolecular energy (kcal/mol) | Frequency | Interaction surface |
|--------|---------------------------------------------|-------------------------------|-------------------------------------------|---------------------------------|----------------------------------------|-----------|---------------------|
| M.UHK  | -6.07                                       | 35.42 $\mu$ M                 | -5.83                                     | -0.24                           | -6.07                                  | 30%       | 1035.59             |
| M.1JF0 | -3.54                                       | 2.55 mM                       | -3.39                                     | -0.14                           | -3.54                                  | 20%       | 992.883             |
| M.2F8P | -9.05                                       | 230.97 nM                     | -9.05                                     | -0.01                           | -9.05                                  | 100%      | 1277.823            |
